# Supplementary material for: Systems Modelling of the Socio-Technical Aspects of Residential Electricity Use and Network Peak Demand
Source: PLOS journal article supplement (doi:10.1371/journal.pone.0134086), 2015-07-30
Supplement: S8 (10.1371/journal.pone.0134086.s008) [file journal.pone.0134086.s008]

**S6 Table. Impact on electricity demand of households being in a High, Low or Nil state of Propensity to Change**

| Change Management Option                   | State of Propensity to Change |      |      |
|--------------------------------------------|-------------------------------|------|------|
|                                            | High                          | Low  | Nil  |
| Acknowledgement & Recognition              | 0.10                          | 0.05 | 0.00 |
| Time of Use Tariffs                        | 0.10                          | 0.05 | 0.00 |
| Off-Peak Tariffs and Managed Supply        | 0.10                          | 0.05 | 0.00 |
| Customer Education & Engagement            | 0.035                         | 0.01 | 0.00 |
| Price Increases                            | 0.05                          | 0.02 | 0.00 |
| Appliances (minimum performance standards) | 0.01                          | 0.00 | 0.00 |
| Capital spend – Insulation                 |                               |      |      |
| Cooling (watts reduction)                  | 280                           | 180  | 0    |
| Heating (watts reduction)                  | 190                           | 140  | 0    |

Proportion or wattage impact on peak demand that will be reduced for each state.  
The data indicates, for example, 0.10 is a 10% reduction in peak demand  
and 280 watt reduction is from a reduction in heat load.
