# Supplementary material for: Systems Modelling of the Socio-Technical Aspects of Residential Electricity Use and Network Peak Demand
Source: PLOS journal article supplement (doi:10.1371/journal.pone.0134086), 2015-07-30
Supplement: S9 (10.1371/journal.pone.0134086.s009) [file journal.pone.0134086.s009]

**S7 Table. Uncertainty applied to impact on peak demand for High and Low states of Propensity to Change**

| <b>Change Management Option</b>            | <b>High</b> | <b>Low</b> |
|--------------------------------------------|-------------|------------|
| Acknowledgement & Recognition              | 10.0%       | 10.0%      |
| Time of Use Tariffs                        | 10.0%       | 10.0%      |
| Off-Peak Tariffs and Managed Supply        | 5.0%        | 5.0%       |
| Customer Education & Engagement            | 20.0%       | 20.0%      |
| Price Increases                            | 5.0%        | 5.0%       |
| Appliances (minimum performance standards) | 5.0%        | 5.0%       |
| Capital Spend – Insulation                 | 20.0%       | 20.0%      |
